# Supplementary material for: Change in Physical Performance Correlates with Decline in Quality of Life and Frailty Status in Head and Neck Cancer Patients Undergoing Radiation with and without Chemotherapy
Source: MDPI journal article supplement (doi:10.3390/cancers13071638), 2021-04-01
Supplement: s1 [file s1]

**Table S1.** Frailty and Quality of life.

|                   |                     | QoL frail (Beta, SE) | <i>p</i> -value |
|-------------------|---------------------|----------------------|-----------------|
| <b>Global</b>     |                     | −0.004 (0.002)       | 0.079           |
| <b>Functional</b> | Physical            | −0.007 (0.003)       | 0.007           |
|                   | Role                | −0.004 (0.002)       | 0.029           |
|                   | Emotion             | −0.010 (0.002)       | <0.001          |
|                   | Cognitive           | −0.008 (0.002)       | <0.001          |
|                   | Social              | −0.005 (0.002)       | 0.023           |
| <b>Symptoms</b>   | Fatigue             | −0.008 (0.002)       | <0.001          |
|                   | Nausea and vomiting | 0.007 (0.002)        | 0.002           |
|                   | Pain                | 0.003 (0.002)        | 0.239           |
|                   | Dyspnea             | 0.007 (0.003)        | 0.009           |
|                   | Insomnia            | 0.002 (0.002)        | 0.443           |
|                   | Appetite            | 0.002 (0.002)        | 0.173           |
|                   | Constipation        | 0.003 (0.002)        | 0.147           |
|                   | Diarrhea            | 0.005 (0.003)        | 0.099           |
